# Supplementary material for: Efficient functionalization of gold nanoparticles using cysteine conjugated protoporphyrin IX for singlet oxygen production in vitro
Source: Royal Society of Chemistry journal article supplement (doi:10.1039/c5ra15862a), 2015-01-01

## Supporting Information

Ashjari et al.

**Supplementary Figure 1-** Absorption Spectrum of the synthesized gold nanoparticle with cysteine after 3 days

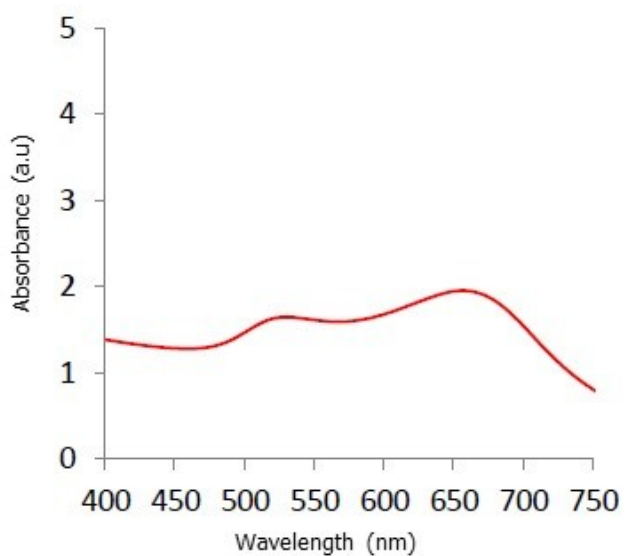

Supplement: c5ra15862a1.pdf [file c5ra15862a1.pdf]
